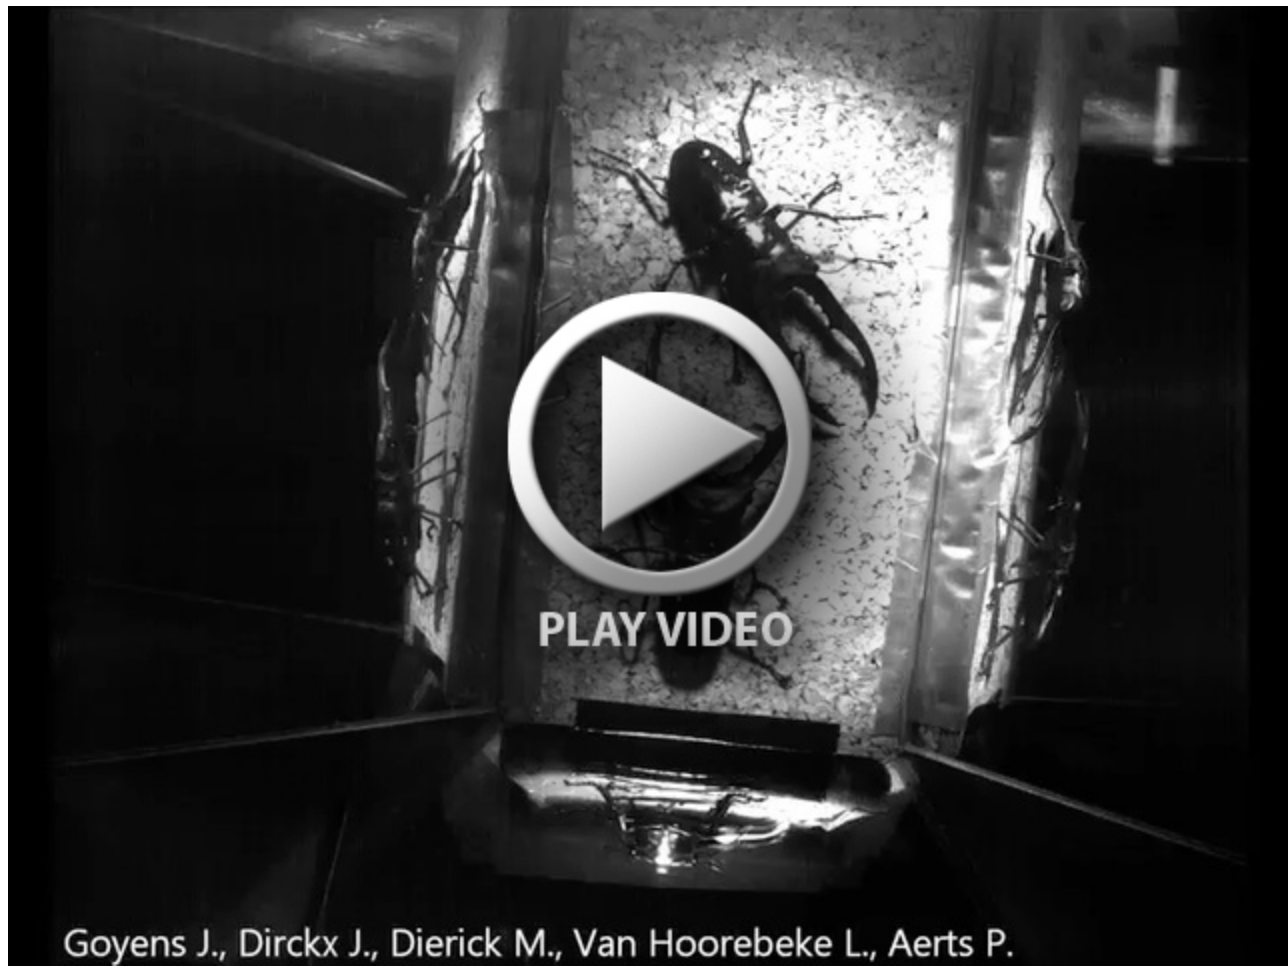

Goyens J., Dirckx J., Dierick M., Van Hoorebeke L., Aerts P.

**Movie 1. Fighting *Cyclommatus metallifer* stag beetles.** Male stag beetles fight each other over mating rights with their large mandibles. Firstly, a high-speed recording of a typical fight is shown. Subsequently, the same movie is repeated 8 times slower.
