# Supplementary figures and images for: Biomechanical determinants of bite force dimorphism inCyclommatus metalliferstag beetles
Source: Oxford University Press journal article supplement (doi:10.1242/jeb.091744), 2014-03-26

# Stag beetle bite force

Jana Govens

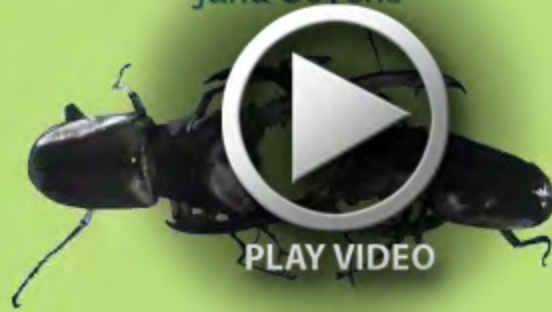

Supplement: jeb091744_video_abstract.pdf [file jeb091744_video_abstract.pdf]
